# Supplementary material for: Chemical systems biology reveals mechanisms of glucocorticoid receptor signaling
Source: Springer Nature journal article supplement (doi:10.1038/s41589-020-00719-w), 2021-01-28
Supplement: 41589_2020_719_MOESM13_ESM.mol [file 41589_2020_719_MOESM13_ESM.mol]

nchembio.A191210496B-comp7.mol
  ChemDraw11202017292D

 36 40  0  0  1  0  0  0  0  0999 V2000
    1.2615   -0.0984    0.0000 C   0  0  0  0  0  0  0  0  0  0  0  0
    1.2615    0.7266    0.0000 C   0  0  0  0  0  0  0  0  0  0  0  0
    0.5469    1.1394    0.0000 C   0  0  0  0  0  0  0  0  0  0  0  0
   -0.1677    0.7266    0.0000 C   0  0  0  0  0  0  0  0  0  0  0  0
   -0.1677   -0.0984    0.0000 C   0  0  0  0  0  0  0  0  0  0  0  0
    0.5469   -0.5106    0.0000 C   0  0  0  0  0  0  0  0  0  0  0  0
   -0.8818    1.1394    0.0000 C   0  0  0  0  0  0  0  0  0  0  0  0
   -1.5964    0.7266    0.0000 C   0  0  0  0  0  0  0  0  0  0  0  0
   -1.5964   -0.0984    0.0000 C   0  0  0  0  0  0  0  0  0  0  0  0
   -0.8818   -0.5106    0.0000 C   0  0  0  0  0  0  0  0  0  0  0  0
   -2.3110   -0.5106    0.0000 C   0  0  0  0  0  0  0  0  0  0  0  0
   -2.3110   -1.3356    0.0000 C   0  0  0  0  0  0  0  0  0  0  0  0
   -1.5963   -1.7482    0.0000 C   0  0  0  0  0  0  0  0  0  0  0  0
   -0.8818   -1.3356    0.0000 C   0  0  0  0  0  0  0  0  0  0  0  0
   -3.0957   -0.2559    0.0000 C   0  0  0  0  0  0  0  0  0  0  0  0
   -3.5804   -0.9234    0.0000 C   0  0  0  0  0  0  0  0  0  0  0  0
   -3.0957   -1.5903    0.0000 C   0  0  0  0  0  0  0  0  0  0  0  0
   -0.1673   -1.7481    0.0000 O   0  0  0  0  0  0  0  0  0  0  0  0
    1.9760    1.1391    0.0000 C   0  0  0  0  0  0  0  0  0  0  0  0
    1.9760    1.9641    0.0000 O   0  0  0  0  0  0  0  0  0  0  0  0
    2.6905    0.7266    0.0000 N   0  0  0  0  0  0  0  0  0  0  0  0
    3.4049    1.1391    0.0000 C   0  0  0  0  0  0  0  0  0  0  0  0
    4.1194    0.7266    0.0000 C   0  0  0  0  0  0  0  0  0  0  0  0
    4.8338    1.1391    0.0000 C   0  0  0  0  0  0  0  0  0  0  0  0
    4.8338    1.9641    0.0000 C   0  0  0  0  0  0  0  0  0  0  0  0
    4.1194    2.3767    0.0000 N   0  0  0  0  0  0  0  0  0  0  0  0
    3.4049    1.9641    0.0000 C   0  0  0  0  0  0  0  0  0  0  0  0
   -2.3978   -2.1599    0.0000 C   0  0  0  0  0  0  0  0  0  0  0  0
   -3.3520   -2.3785    0.0000 O   0  0  0  0  0  0  0  0  0  0  0  0
   -3.9144   -1.7200    0.0000 C   0  0  0  0  0  0  0  0  0  0  0  0
   -4.7330   -1.8496    0.0000 C   0  0  0  0  0  0  0  0  0  0  0  0
   -5.5516   -1.9793    0.0000 C   0  0  0  0  0  0  0  0  0  0  0  0
   -2.3110    0.3182    0.0000 H   0  0  0  0  0  0  0  0  0  0  0  0
   -0.8818    0.3182    0.0000 H   0  0  0  0  0  0  0  0  0  0  0  0
   -1.5964   -0.9272    0.0000 H   0  0  0  0  0  0  0  0  0  0  0  0
    5.5516    2.3785    0.0000 C   0  0  0  0  0  0  0  0  0  0  0  0
  1  2  2  0      
  2  3  1  0      
  3  4  2  0      
  4  5  1  0      
  5  6  2  0      
  6  1  1  0      
  4  7  1  0      
  7  8  1  0      
  8  9  1  0      
  9 10  1  0      
 10  5  1  0      
  9 11  1  0      
 11 12  1  0      
 12 13  1  0      
 13 14  1  0      
 14 10  1  0      
 11 15  1  0      
 15 16  1  0      
 16 17  1  0      
 17 12  1  0      
 14 18  1  1      
  2 19  1  0      
 19 20  2  0      
 19 21  1  0      
 21 22  1  0      
 22 23  2  0      
 23 24  1  0      
 24 25  2  0      
 25 26  1  0      
 26 27  2  0      
 27 22  1  0      
 12 28  1  1      
 17 29  1  1      
 17 30  1  6      
 30 31  3  0      
 31 32  1  0      
 11 33  1  6      
 10 34  1  6      
  9 35  1  1      
 25 36  1  0      
M  END
