# Supplementary material for: Chemical systems biology reveals mechanisms of glucocorticoid receptor signaling
Source: Springer Nature journal article supplement (doi:10.1038/s41589-020-00719-w), 2021-01-28
Supplement: 41589_2020_719_MOESM35_ESM.mol [file 41589_2020_719_MOESM35_ESM.mol]

nchembio.A191210496B-comp18.mol
  ChemDraw11202017292D

 44 49  0  0  1  0  0  0  0  0999 V2000
    1.6203    0.8286    0.0000 C   0  0  0  0  0  0  0  0  0  0  0  0
    1.6203    1.6536    0.0000 C   0  0  0  0  0  0  0  0  0  0  0  0
    0.9058    2.0664    0.0000 C   0  0  0  0  0  0  0  0  0  0  0  0
    0.1912    1.6536    0.0000 C   0  0  0  0  0  0  0  0  0  0  0  0
    0.1912    0.8286    0.0000 C   0  0  0  0  0  0  0  0  0  0  0  0
    0.9058    0.4164    0.0000 C   0  0  0  0  0  0  0  0  0  0  0  0
   -0.5228    2.0664    0.0000 C   0  0  0  0  0  0  0  0  0  0  0  0
   -1.2374    1.6536    0.0000 C   0  0  0  0  0  0  0  0  0  0  0  0
   -1.2374    0.8286    0.0000 C   0  0  0  0  0  0  0  0  0  0  0  0
   -0.5228    0.4164    0.0000 C   0  0  0  0  0  0  0  0  0  0  0  0
   -1.9520    0.4164    0.0000 C   0  0  0  0  0  0  0  0  0  0  0  0
   -1.9520   -0.4085    0.0000 C   0  0  0  0  0  0  0  0  0  0  0  0
   -1.2373   -0.8211    0.0000 C   0  0  0  0  0  0  0  0  0  0  0  0
   -0.5228   -0.4085    0.0000 C   0  0  0  0  0  0  0  0  0  0  0  0
   -2.7367    0.6711    0.0000 C   0  0  0  0  0  0  0  0  0  0  0  0
   -3.2213    0.0037    0.0000 C   0  0  0  0  0  0  0  0  0  0  0  0
   -2.7367   -0.6632    0.0000 C   0  0  0  0  0  0  0  0  0  0  0  0
    0.1916   -0.8210    0.0000 O   0  0  0  0  0  0  0  0  0  0  0  0
    2.3348    2.0661    0.0000 C   0  0  0  0  0  0  0  0  0  0  0  0
    2.3348    2.8910    0.0000 O   0  0  0  0  0  0  0  0  0  0  0  0
    3.0492    1.6536    0.0000 N   0  0  0  0  0  0  0  0  0  0  0  0
    3.7636    2.0661    0.0000 C   0  0  0  0  0  0  0  0  0  0  0  0
    0.1916   -1.6460    0.0000 C   0  0  0  0  0  0  0  0  0  0  0  0
    4.4781    1.6536    0.0000 C   0  0  0  0  0  0  0  0  0  0  0  0
    5.1925    2.0661    0.0000 C   0  0  0  0  0  0  0  0  0  0  0  0
    5.1925    2.8911    0.0000 C   0  0  0  0  0  0  0  0  0  0  0  0
    4.4781    3.3036    0.0000 N   0  0  0  0  0  0  0  0  0  0  0  0
    3.7636    2.8911    0.0000 C   0  0  0  0  0  0  0  0  0  0  0  0
    3.0492    3.3035    0.0000 C   0  0  0  0  0  0  0  0  0  0  0  0
   -2.0388   -1.2328    0.0000 C   0  0  0  0  0  0  0  0  0  0  0  0
   -2.9929   -1.4514    0.0000 O   0  0  0  0  0  0  0  0  0  0  0  0
   -3.5553   -0.7929    0.0000 C   0  0  0  0  0  0  0  0  0  0  0  0
   -4.3739   -0.9225    0.0000 C   0  0  0  0  0  0  0  0  0  0  0  0
   -5.1925   -1.0522    0.0000 C   0  0  0  0  0  0  0  0  0  0  0  0
   -1.9520    1.2452    0.0000 H   0  0  0  0  0  0  0  0  0  0  0  0
   -0.5228    1.2452    0.0000 H   0  0  0  0  0  0  0  0  0  0  0  0
   -1.2374   -0.0002    0.0000 H   0  0  0  0  0  0  0  0  0  0  0  0
   -0.5262   -2.0604    0.0000 C   0  0  0  0  0  0  0  0  0  0  0  0
   -1.2439   -1.6460    0.0000 C   0  0  0  0  0  0  0  0  0  0  0  0
   -1.9617   -2.0604    0.0000 C   0  0  0  0  0  0  0  0  0  0  0  0
   -1.9617   -2.8892    0.0000 C   0  0  0  0  0  0  0  0  0  0  0  0
   -1.2439   -3.3036    0.0000 C   0  0  0  0  0  0  0  0  0  0  0  0
   -0.5262   -2.8892    0.0000 C   0  0  0  0  0  0  0  0  0  0  0  0
    0.1916   -3.3036    0.0000 Cl  0  0  0  0  0  0  0  0  0  0  0  0
  1  2  2  0      
  2  3  1  0      
  3  4  2  0      
  4  5  1  0      
  5  6  2  0      
  6  1  1  0      
  4  7  1  0      
  7  8  1  0      
  8  9  1  0      
  9 10  1  0      
 10  5  1  0      
  9 11  1  0      
 11 12  1  0      
 12 13  1  0      
 13 14  1  0      
 14 10  1  0      
 11 15  1  0      
 15 16  1  0      
 16 17  1  0      
 17 12  1  0      
 14 18  1  1      
  2 19  1  0      
 19 20  2  0      
 19 21  1  0      
 21 22  1  0      
 18 23  1  0      
 22 24  2  0      
 24 25  1  0      
 25 26  2  0      
 26 27  1  0      
 27 28  2  0      
 28 22  1  0      
 28 29  1  0      
 12 30  1  1      
 17 31  1  1      
 17 32  1  6      
 32 33  3  0      
 33 34  1  0      
 11 35  1  6      
 10 36  1  6      
  9 37  1  1      
 23 38  1  0      
 38 39  2  0      
 39 40  1  0      
 40 41  2  0      
 41 42  1  0      
 42 43  2  0      
 43 38  1  0      
 43 44  1  0      
M  END
